# Supplementary material
Source: HighWire-hosted journal article supplement (http://molpharm.aspetjournals.org/highwire/filestream/77146/field_highwire_adjunct_files/2/Mol_Pharmacol_Sup_2.pdf)

# Supplementary Figure 2

## 5-cholesten-3 $\beta$ ,25-diol 3-sulfonate (25HC3S)

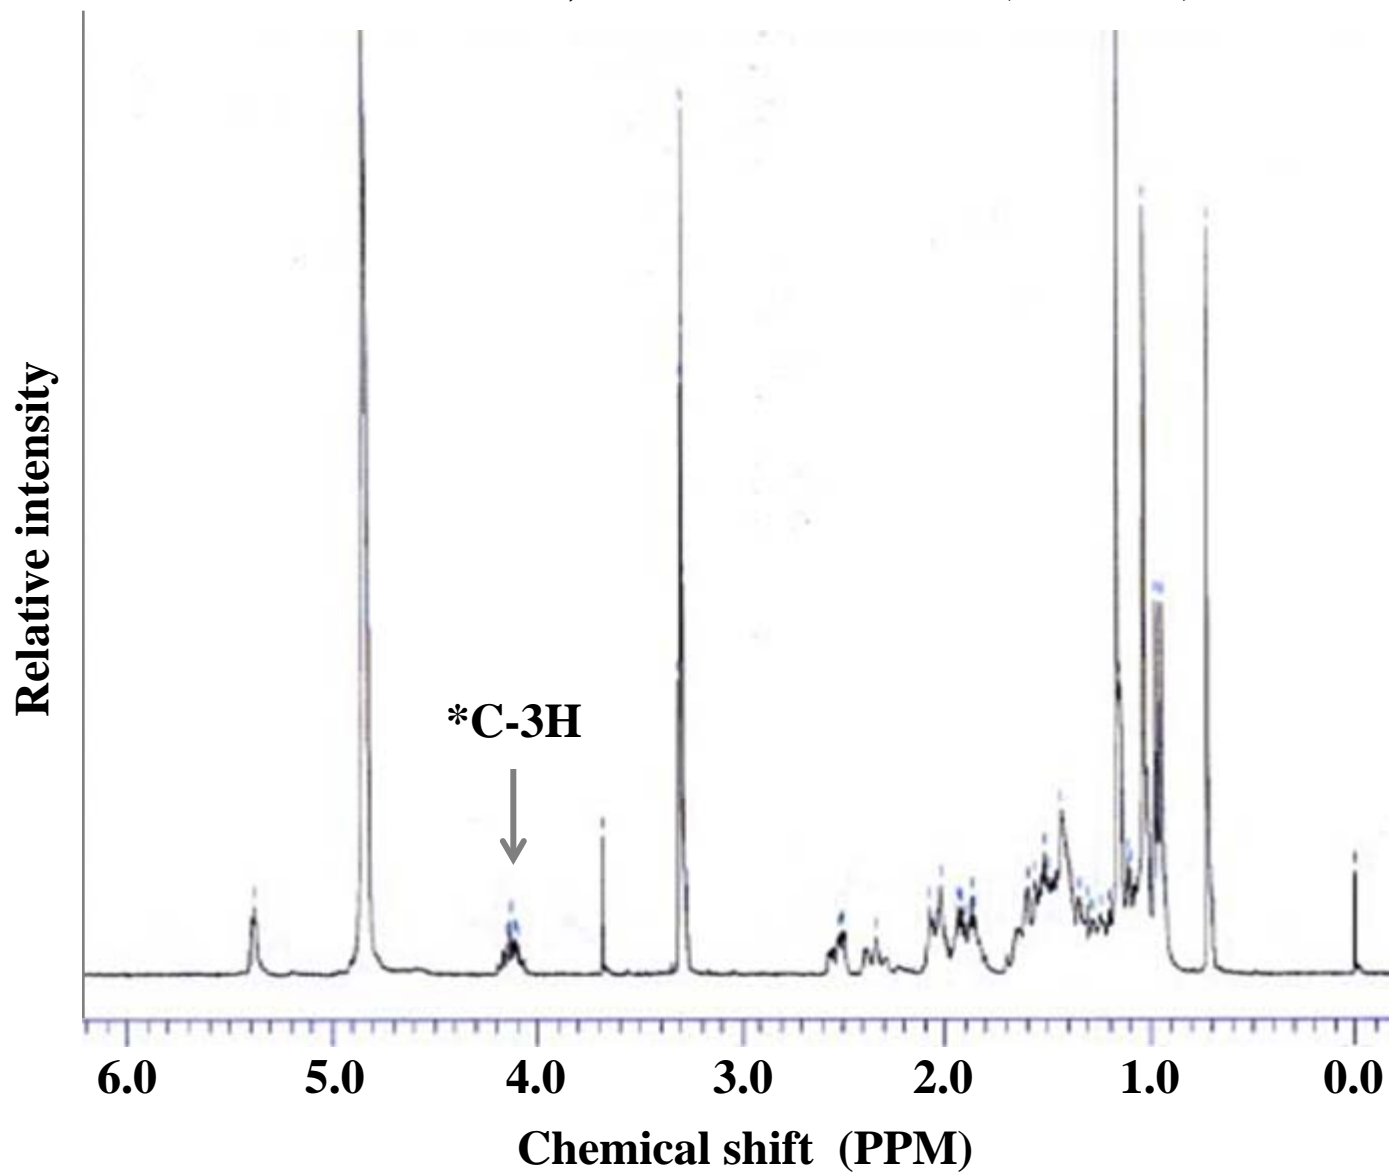

Supplement: Mol_Pharmacol_Sup_2.pdf [file Mol_Pharmacol_Sup_2.pdf]
